# Supplementary material for: Investigation on [OH−]-responsive systems for construction of one-dimensional hydroxyapatite via a solvothermal method
Source: Royal Society of Chemistry journal article supplement (doi:10.1039/d0nj04476h), 2020-11-24
Supplement: d0nj04476h1.pdf [file d0nj04476h1.pdf]

## Electronic Supplementary Information for the Manuscript:

### Investigation on [OH<sup>-</sup>]-responsive System Subjects to Construction of One-dimensional Hydroxyapatite *via* Solvothermal Method

Yin-chuan Wang<sup>a,b,c</sup>, Gui-yong Xiao<sup>a,b,c,\*</sup>, Wei-li Xu<sup>a,b,c</sup>, Kai Wang<sup>a,b,c</sup>, Yan Jiao<sup>d</sup>, Mei-li Qi<sup>a,b</sup>, Yupeng Lu<sup>a,b,c,\*</sup>

<sup>a</sup> Key Laboratory for Liquid-Solid Structural Evolution and Processing of Materials, Ministry of Education, Shandong University, Ji'nan 250061, China

<sup>b</sup> School of Materials Science and Engineering, Shandong University, Ji'nan, 250061, China

<sup>c</sup> Suzhou Institute of Shandong University, Suzhou, 215123, China

<sup>d</sup> Food and Drug Department, Shandong Institute of Commerce and Technology

†Electronic supplementary information available: A table (Table. S1) of comparison of different synthesis methods of 1D HA crystals. XRD patterns (Fig. S1) and FESEM photographs (Fig. S2) of HA synthesized with different concentrations of NaOH. Digital photographs (Fig. S3) of the highly flexible paper prepared by the sample NF4.

Table S1. Comparison of different synthesis methods of 1D HA crystals.

| Synthesis Method                              | ipH                              | additive                                    | Phases                  | Morphology of HA in literature                     | Approx. length or diameter                                       | Ref.                |
|-----------------------------------------------|----------------------------------|---------------------------------------------|-------------------------|----------------------------------------------------|------------------------------------------------------------------|---------------------|
| hydrothermal method                           | ~3                               | citric acid, urea                           | HA                      | whisker, plate, prism, needles                     | 10-30 $\mu\text{m}$                                              | 1, 2                |
|                                               | 4                                | trisodium citrate, <i>NO</i>                | HA, DCPA, DCPD, OCP     | fibrous microparticles, microsheet                 | 0.9 $\mu\text{m}$ , 7-8 $\mu\text{m}$                            | 3, 4                |
|                                               | ~5                               | trisodium citrate, <i>NO</i>                | HA                      | whisker, microflower, microsphere, nano-/microeire | 30-50 $\mu\text{m}$ , ~10 $\mu\text{m}$ , 0.5-5 $\mu\text{m}$    | 4-7                 |
|                                               | 6                                | <i>NO</i>                                   | HA, DCPA, OCP           | whisker, plate-like nanoparticle, nanorod          | 20 $\mu\text{m}$ , ~80nm,                                        | 3, 8                |
|                                               | ~7                               | trisodium citrate, Ca-EDTA, <i>NO</i>       | HA                      | nanorod, whisker                                   | 100-300 nm, 0.7-1 $\mu\text{m}$ , 5-10 $\mu\text{m}$             | 4, 6, 9, 10         |
|                                               | ~8                               | <i>NO</i>                                   | HA                      | nano-/microwire                                    | 0.5-5 $\mu\text{m}$                                              | 6                   |
|                                               | 9                                | CTAB, trisodium citrate, Ca-EDTA, <i>NO</i> | HA                      | fiber, whisker, nanorod, spherical nanoparticle    | ~2 $\mu\text{m}$ , ~60 nm, ~12 $\mu\text{m}$ , ~200 nm           | 3, 4, 7, 8, 10-12   |
|                                               | ~10                              | Na <sub>2</sub> EDTA, dodecylamine, P123    | HA                      | nanorod, plate-like                                | ~15 $\mu\text{m}$ , ~70 nm, 120-600 nm                           | 13-15               |
|                                               | 11                               | Na <sub>2</sub> EDTA, P123                  | HA                      | dumbbell                                           | ~15 $\mu\text{m}$ , 120-600 nm                                   | 13, 15              |
|                                               | ~12                              | Na <sub>2</sub> EDTA, <i>NO</i>             | HA                      | microsphere, nanobelt, nanorod                     | ~10.7 $\mu\text{m}$ , ~1.5 $\mu\text{m}$ , 150-300 $\mu\text{m}$ | 13, 16, 17          |
|                                               | 13                               | CTAB                                        | HA, $\beta$ -TCP        | spheroidal particle                                | ~27 nm                                                           | 11                  |
|                                               | ~14                              | <i>NO</i>                                   | HA, Ca(OH) <sub>2</sub> | particle, nano-/microwires                         | 150 nm, 0.5-5 $\mu\text{m}$                                      | 6, 8                |
|                                               | homogeneous precipitation method | 6-10                                        | Ca-EDTA                 | HA                                                 | fiber                                                            | 10-20 $\mu\text{m}$ |
| hydrothermal homogeneous precipitation method | ~3                               | urea, acetamide, propanmide                 | HA                      | whisker, plate- or branch-like particle            | 60-300 $\mu\text{m}$ ,                                           | 19-21               |
| precipitation method                          | 4.1-4.7                          | <i>NO</i>                                   | HA, DCPA                | whisker                                            | ~100 $\mu\text{m}$                                               | 22                  |
|                                               | 4.8-5.0                          | <i>NO</i>                                   | HA                      | whisker                                            | 100-300 $\mu\text{m}$                                            | 22                  |
| dissolution-precipitation process             | 12                               | Schiff bases                                | HA                      | nanorods, nanoparticle                             | 35-200 nm, 10-18 nm                                              | 23                  |
|                                               | 7, 9                             | EDTA                                        | HA                      | whisker                                            | 3 $\mu\text{m}$                                                  | 24                  |

*Note:* 1. hydroxyapatite: HA, dicalcium phosphate anhydrous: DCPA, dicalcium phosphate dehydrate: DCDP, octacalcium phosphate: OCP,  $\beta$ -TCP:  $\beta$ -tricalcium

phosphate; cetyltrimethylammonium bromide: CTAB, ethylene diamine tetraacetic acid: EDTA, disodium ethylene diamine tetraacetate: Na<sub>2</sub>EDTA; PEO20-PPO70-PEO20: P123.

2. “*NO*” represents that the products reported in some literatures are synthesized without the use of additives.

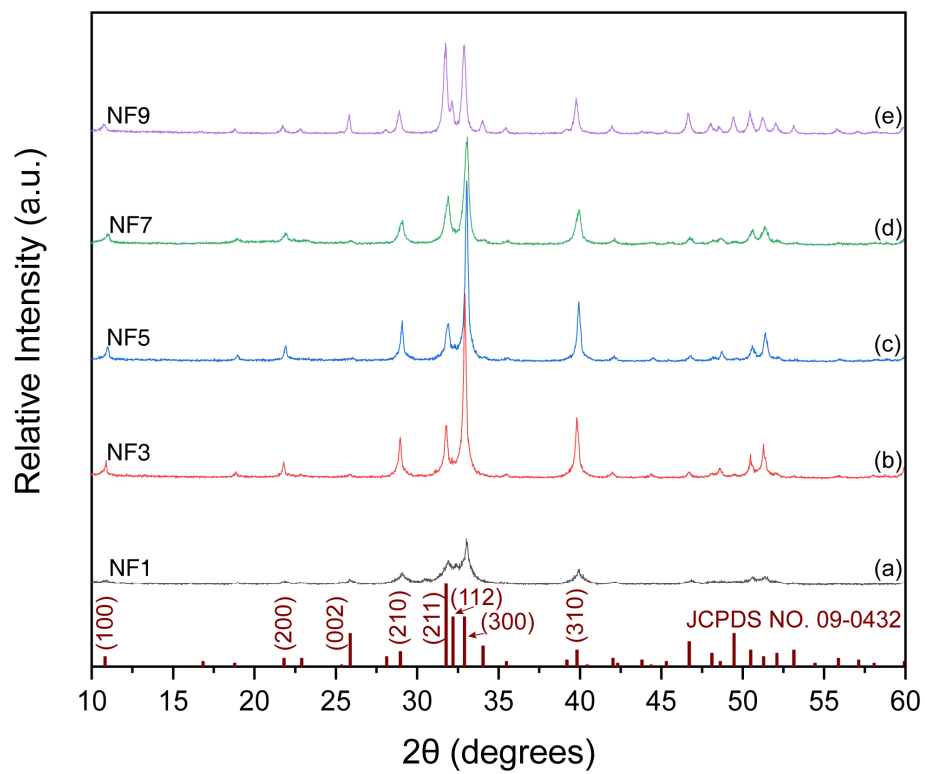

Fig. S1. XRD patterns of HA synthesized with different concentrations of NaOH. (a) 1.00 M; (b) 1.25 M; (c) 1.50 M; (d) 1.75 M; (e) 2.00 M.

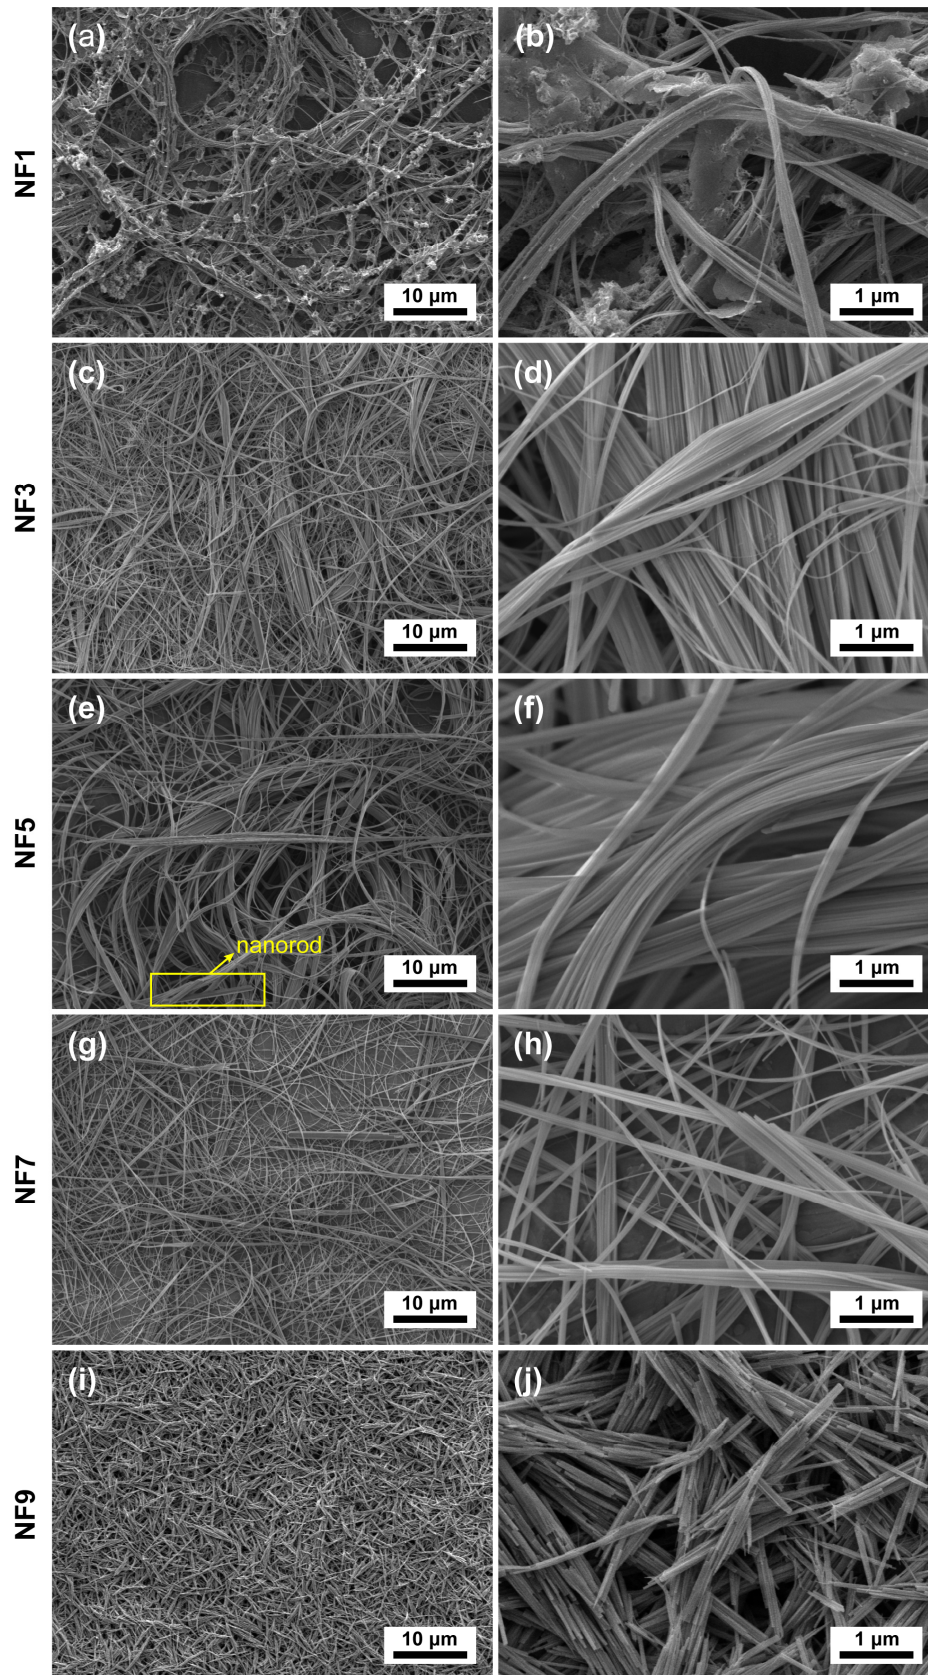

Fig. S2. FESEM photographs of HA synthesized with different concentrations of NaOH. (a-b) 1.00 M; (c-d) 1.25 M; (e-f) 1.50 M; (g-h) 1.75 M; (i-j) 2.00 M.

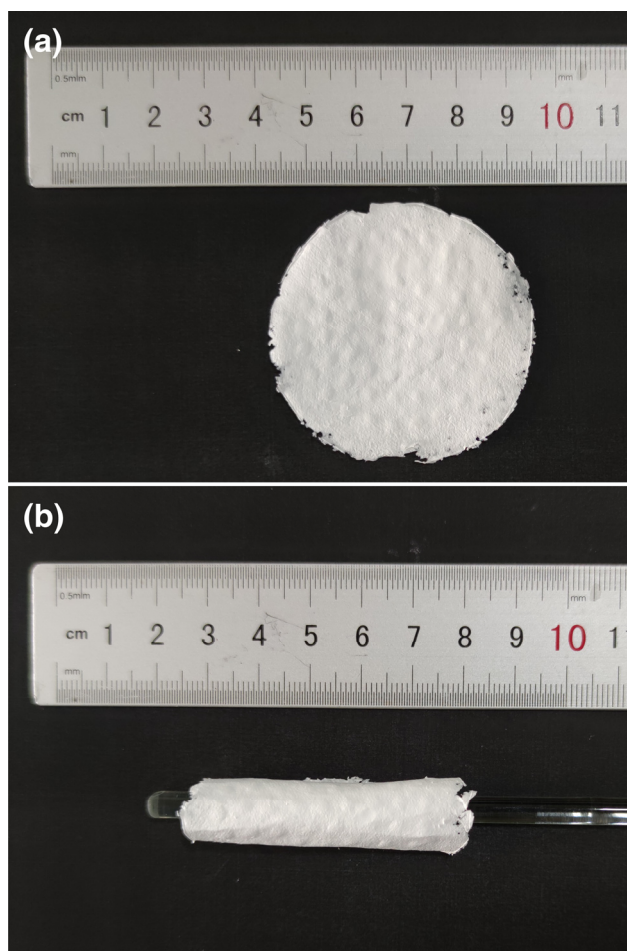

Fig. S3. Digital photographs of the highly flexible paper prepared by the sample NF4. The paper forms through a simple process of suction filtration and can be bent without breaking.

### References of Table. S1:

1. M. Yoshimura, H. Suda, K. Okamoto and K. Ioku, *Journal of Materials Science*, 1994, **29**, 3399-3402.
2. I. S. Neira, Y. V. Kolen'ko, O. I. Lebedev, G. Van Tendeloo, H. S. Gupta, F. Guitián and M. Yoshimura, *Crystal Growth & Design*, 2009, **9**, 466-474.
3. M. Sadat-Shojai, M.-T. Khorasani and A. Jamshidi, *J. Cryst. Growth*, 2012, **361**, 73-84.
4. C. Zhang, J. Yang, Z. Quan, P. Yang, C. Li, Z. Hou and J. Lin, *Crystal Growth & Design*, 2009, **9**, 2725-2733.
5. Y. Mizutani, M. Hattori, M. Okuyama, T. Kasuga and M. Nogami, *J. Eur. Ceram. Soc.*, 2005, **25**, 3181-3185.
6. D. O. Costa, S. J. Dixon and A. S. Rizkalla, *ACS applied materials & interfaces*, 2012, **4**, 1490-1499.
7. X.-Y. Zhao, Y.-J. Zhu, F. Chen, B.-Q. Lu, C. Qi, J. Zhao and J. Wu, *CrystEngComm*, 2013, **15**.
8. J. Liu, X. Ye, H. Wang, M. Zhu, B. Wang and H. Yan, *Ceram. Int.*, 2003, **29**, 629-633.
9. F. Ren, Y. Ding, X. Ge, X. Lu, K. Wang and Y. Leng, *J. Cryst. Growth*, 2012, **349**, 75-82.
10. H. Arce, M. L. Montero, A. Sáenz and V. M. Castaño, *Polyhedron*, 2004, **23**, 1897-1901.
11. Y. Wang, J. Chen, K. Wei, S. Zhang and X. Wang, *Mater. Lett.*, 2006, **60**, 3227-3231.
12. X.-Y. Zhao, Y.-J. Zhu, B.-Q. Lu, F. Chen, C. Qi, J. Zhao and J. Wu, *Mater. Res. Bull.*, 2014, **55**, 67-70.
13. Y. Qi, J. Shen, Q. Jiang, B. Jin, J. Chen and X. Zhang, *Adv. Powder Technol.*, 2015, **26**, 1041-1046.
14. J. D. Chen, Y. J. Wang, K. Wei, S. H. Zhang and X. T. Shi, *Biomaterials*, 2007, **28**, 2275-2280.
15. N. K. Nga, L. T. Giang, T. Q. Huy, P. H. Viet and C. Migliaresi, *Colloids Surf. B. Biointerfaces*, 2014, **116**, 666-673.
16. L. An, W. Li, Y. Xu, D. Zeng, Y. Cheng and G. Wang, *Ceram. Int.*, 2016, **42**, 3104-3112.
17. H. Li, L. Mei, H. Liu, Y. Liu, L. Liao and R. V. Kumar, *Crystal Growth & Design*, 2017, **17**, 2809-2815.
18. K. Kandori, N. Horigami, A. Yasukawa and T. Ishikawa, *J. Am. Ceram. Soc.*, 1997, **80**, 1157-1164.
19. H. Zhang and B. W. Darvell, *Acta Biomater.*, 2011, **7**, 2960-2968.
20. M.-l. Qi, G.-y. Xiao and Y.-p. Lu, *Acta Metallurgica Sinica (English Letters)*, 2016, **29**, 609-613.
21. H. Zhang and B. W. Darvell, *Acta Biomater.*, 2010, **6**, 3216-3222.
22. T. Iizuka and A. Nozuma, *J. Ceram. Soc. Jpn.*, 1999, **107**, 442-448.
23. F. Mohandes, M. Salavati-Niasari, Z. Fereshteh and M. Fathi, *Ceram. Int.*, 2014, **40**, 12227-12233.

24. D. S. Seo and J. K. Lee, *J. Cryst. Growth*, 2008, **310**, 2162-2167.
